# Supplementary material
Source: PubMed Central journal article supplement (PMC6708272)
Supplement: Supp_Fig1.pdf [file Supp_Fig1.pdf]

## Supplementary Data

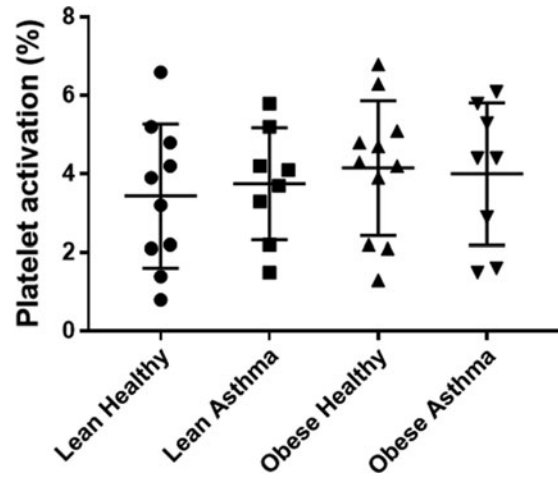

**SUPPLEMENTARY FIG. S1.** Platelet Activation levels measured by assessment of p-selectin expression.
